# Supplementary material for: Exploring the role of the posterior middle temporal gyrus in semantic cognition: Integration of anterior temporal lobe with executive processes
Source: PubMed Central journal article supplement (PMC4927261; doi:10.1016/j.neuroimage.2016.05.051), 2016-08-15
Supplement: mmc1.pdf [file mmc1.pdf]

Table S1. Cluster COG, size, and sub-peaks for the contrasts and conjunction in the top row of Figure 3. Peaks were identified in z-statistic spatial maps following cluster correction for multiple comparisons with a Z inclusion threshold of 2.3 and a cluster significance threshold set at  $p < .05$ .

|                                   | Cluster size<br>(Voxels) | Cluster p-<br>value (-<br>log10) | MNI coordinates |     |     |     | Hemisphere | Location                                  |
|-----------------------------------|--------------------------|----------------------------------|-----------------|-----|-----|-----|------------|-------------------------------------------|
|                                   |                          |                                  | Z               | X   | Y   | Z   |            |                                           |
| <b>Action &gt; colour</b>         |                          |                                  |                 |     |     |     |            |                                           |
| Cluster 1<br>COG (-44 -<br>53 26) | 7814                     | 14                               | 5.25            | -58 | -66 | -6  | LH         | Inferior Lateral Occipital cortex         |
|                                   |                          |                                  | 5.22            | -58 | -68 | -12 | LH         | Inferior Lateral Occipital cortex         |
|                                   |                          |                                  | 5.17            | -52 | -44 | 36  | LH         | Posterior Supramarginal gyrus             |
|                                   |                          |                                  | 5.12            | -60 | -34 | 30  | LH         | Anterior Supramarginal gyrus              |
|                                   |                          |                                  | 5.08            | -54 | -32 | 44  | LH         | Anterior Supramarginal gyrus              |
|                                   |                          |                                  | 5.04            | -38 | -54 | 52  | LH         | Superior Parietal Lobule                  |
|                                   |                          |                                  | 4.62            | -36 | -6  | 46  | LH         | Precentral gyrus                          |
| Cluster 2<br>COG (-27 -4<br>50)   | 2416                     | 5.48                             | 3.91            | -24 | -14 | 46  | LH         | Precentral gyrus                          |
|                                   |                          |                                  | 3.91            | -22 | -10 | 42  | LH         | Left cerebral white matter                |
|                                   |                          |                                  | 3.88            | -28 | -10 | 48  | LH         | Precentral gyrus                          |
|                                   |                          |                                  | 3.87            | -22 | 0   | 46  | LH         | Superior Frontal gyrus                    |
|                                   |                          |                                  | 3.85            | -36 | -8  | 36  | LH         | Left cerebral white matter                |
|                                   |                          |                                  | 5.27            | -52 | 10  | 6   | LH         | Inferior Frontal gyrus, pars opercularis  |
|                                   |                          |                                  | 4.27            | -48 | 32  | -4  | LH         | Inferior Frontal gyrus, pars opercularis  |
| Cluster 3<br>COG (-48 20<br>10)   | 2022                     | 4.67                             | 4.19            | -42 | 30  | -2  | LH         | Frontal Orbital cortex                    |
|                                   |                          |                                  | 4.08            | -52 | 4   | 20  | LH         | Precentral gyrus                          |
|                                   |                          |                                  | 4.05            | -50 | 24  | 12  | LH         | Inferior Frontal gyrus, pars triangularis |
|                                   |                          |                                  | 3.91            | -52 | 40  | -2  | LH         | Frontal pole                              |
|                                   |                          |                                  |                 |     |     |     |            |                                           |
| <b>Global all &gt; size all</b>   |                          |                                  |                 |     |     |     |            |                                           |
| Cluster 1<br>COG (-51 -<br>32-2)  | 6967                     | 11.2                             | 5.01            | -58 | -32 | -8  | LH         | Posterior Middle Temporal gyrus           |
|                                   |                          |                                  | 5.01            | -44 | -62 | 26  | LH         | Superior Lateral occipital cortex         |
|                                   |                          |                                  | 4.99            | -42 | -68 | 32  | LH         | Superior Lateral occipital cortex         |
|                                   |                          |                                  | 4.88            | -68 | -44 | -8  | LH         | Posterior Middle Temporal gyrus           |
|                                   |                          |                                  | 4.84            | -60 | -56 | 2   | LH         | Temporooccipital Middle Temporal gyrus    |
|                                   |                          |                                  | 4.76            | -54 | -56 | 30  | LH         | Angular gyrus                             |
|                                   |                          |                                  | 5.15            | 58  | -52 | 4   | RH         | Superior middle temporal gyrus            |
| Cluster 2<br>COG (-52 -<br>35-1)  | 6485                     | 10.6                             | 5.04            | 60  | -54 | 16  | RH         | Angular gyrus                             |
|                                   |                          |                                  | 5.01            | 58  | -44 | 0   | RH         | Temporooccipital Middle Temporal gyrus    |
|                                   |                          |                                  | 5.01            | 60  | -48 | 2   | RH         | Temporooccipital Middle Temporal gyrus    |
|                                   |                          |                                  | 4.49            | 46  | -82 | 10  | RH         | Inferior Lateral Occipital cortex         |
|                                   |                          |                                  | 4.42            | 54  | -10 | -22 | RH         | Posterior Middle Temporal gyrus           |
| Cluster 3<br>COG (-7 39<br>31)    | 6301                     | 10.3                             | 4.71            | -16 | 38  | 44  | LH         | Superior Frontal gyrus                    |
|                                   |                          |                                  | 4.65            | -16 | 56  | 30  | LH         | Frontal pole                              |
|                                   |                          |                                  | 4.22            | -42 | 10  | 52  | LH         | Middle Frontal gyrus                      |
|                                   |                          |                                  | 4.06            | -42 | 6   | 52  | LH         | Middle Frontal gyrus                      |
|                                   |                          |                                  | 4.06            | -40 | 2   | 52  | LH         | Middle Frontal gyrus                      |
|                                   |                          |                                  | 3.94            | -8  | 50  | -6  | LH         | Paracingulate gyrus                       |
|                                   |                          |                                  | 5.28            | -6  | -60 | 28  | LH         | Precuneous cortex                         |
| Cluster 4<br>COG (1 -57<br>35)    | 3273                     | 6.11                             | 4.83            | 8   | -54 | 30  | RH         | Precuneous cortex                         |
|                                   |                          |                                  | 4.62            | -2  | -50 | 28  | LH         | Cingulate gyrus                           |
|                                   |                          |                                  | 3.73            | 2   | -54 | 44  | RH         | Precuneous cortex                         |
|                                   |                          |                                  | 3.46            | 8   | -52 | 50  | RH         | Precuneous cortex                         |
|                                   |                          |                                  | 3.43            | -8  | -48 | 50  | LH         | Precuneous cortex                         |
| Cluster 4<br>COG (12 -81<br>-25)  | 2872                     | 4.49                             | 4.49            | 16  | -86 | -36 | RH         | Cerebellum                                |
|                                   |                          |                                  | 4.3             | 32  | -80 | -42 | RH         | Cerebellum                                |
|                                   |                          |                                  | 4.26            | 18  | -86 | -42 | RH         | Cerebellum                                |

|      |    |     |     |    |                                   |
|------|----|-----|-----|----|-----------------------------------|
| 4.22 | 46 | -80 | -12 | RH | Inferior Lateral Occipital cortex |
| 4.2  | 30 | -88 | -30 | RH | Inferior Lateral Occipital cortex |
| 3.83 | 20 | -78 | -34 | RH | Cerebellum                        |

---

**Action > colour & global all > size all conjunction**

|                                 |     |      |      |     |     |    |    |                                        |
|---------------------------------|-----|------|------|-----|-----|----|----|----------------------------------------|
| Cluster 1<br>COG (-50-60<br>14) | 689 | 1.42 | 4.45 | -58 | -56 | 0  | LH | Temporooccipital Middle Temporal gyrus |
|                                 |     |      | 4.21 | -56 | -54 | -4 | LH | Temporooccipital Middle Temporal gyrus |
|                                 |     |      | 3.62 | -54 | -52 | 28 | LH | Angular gyrus                          |
|                                 |     |      | 3.32 | -46 | -60 | 4  | LH | Temporooccipital Middle Temporal gyrus |
|                                 |     |      | 3.23 | -42 | -62 | 8  | LH | Inferior Lateral Occipital cortex      |
|                                 |     |      | 3.21 | -38 | -60 | 10 | LH | Temporooccipital Middle Temporal gyrus |

---

Table provides data for all significant clusters and sub-peaks within each cluster, with the first sub-peak being the cluster maxima. Location was determined using the Harvard-Oxford cortical structural atlas built into FSL. COG = centre of gravity.

Table S2. Cluster COG, size, and sub-peaks for the contrasts and conjunction in the bottom row of Figure 3. Peaks were identified in z-statistic spatial maps following cluster correction for multiple comparisons with a Z inclusion threshold of 2.3 and a cluster significance threshold set at  $p < .05$ .

|                                                | Cluster size (Voxels) | Cluster p-value (-log10) | MNI coordinates |     |     |     | Hemisphere | Location                                  |
|------------------------------------------------|-----------------------|--------------------------|-----------------|-----|-----|-----|------------|-------------------------------------------|
|                                                |                       |                          | Z               | X   | Y   | Z   |            |                                           |
| <b>Feature selection &gt; global semantics</b> |                       |                          |                 |     |     |     |            |                                           |
| Cluster 1<br>COG (-38 15 10)                   | 4760                  | 8.93                     | 5.8             | -42 | 28  | 16  | LH         | Inferior Frontal gyrus, pars triangularis |
|                                                |                       |                          | 5.68            | -46 | 38  | 6   | LH         | Frontal pole                              |
|                                                |                       |                          | 5.55            | -46 | 42  | 0   | LH         | Frontal pole                              |
|                                                |                       |                          | 5.34            | -32 | 18  | -4  | LH         | Insular cortex                            |
|                                                |                       |                          | 5.33            | -30 | 22  | -6  | LH         | Insular cortex                            |
|                                                |                       |                          | 5.27            | -40 | 0   | 28  | LH         | Precentral gyrus                          |
| Cluster 2<br>COG (-40 -49 40)                  | 2542                  | 5.3                      | 5.4             | -40 | -50 | 40  | LH         | Angular gyrus                             |
|                                                |                       |                          | 5.02            | -28 | -54 | 30  | LH         | Superior Lateral Occipital cortex         |
|                                                |                       |                          | 4.99            | -28 | -72 | 42  | LH         | Superior Lateral Occipital cortex         |
|                                                |                       |                          | 4.29            | -50 | -38 | 42  | LH         | Anterior Supramarginal gyrus              |
|                                                |                       |                          | 4.03            | -44 | -40 | 28  | LH         | Parietal Operculum cortex                 |
|                                                |                       |                          | 3.71            | -36 | -66 | 56  | LH         | Superior Lateral Occipital cortex         |
| Cluster 3<br>COG (-36 -60 -17)                 | 1258                  | 2.7                      | 5.04            | -42 | -58 | -10 | LH         | Temporooccipital Inferior Temporal gyrus  |
|                                                |                       |                          | 4.18            | -50 | -60 | -18 | LH         | Temporooccipital Inferior Temporal gyrus  |
|                                                |                       |                          | 4.09            | 10  | -80 | -32 | RH         | Cerebellum                                |
|                                                |                       |                          | 3.25            | -24 | -48 | -24 | LH         | Cerebellum                                |
|                                                |                       |                          | 3.11            | -8  | -80 | -34 | LH         | Cerebellum                                |
|                                                |                       |                          | 3.09            | -36 | -46 | -22 | LH         | Temporal Occipital Fusiform cortex        |
| Cluster 4<br>COG (-3 18 44)                    | 1103                  | 2.09                     | 6.02            | -6  | 20  | 40  | LH         | Paracingulate gyrus                       |
|                                                |                       |                          | 3.8             | 6   | 24  | 44  | RH         | Paracingulate gyrus                       |
|                                                |                       |                          | 3.73            | 10  | 22  | 42  | RH         | Paracingulate gyrus                       |
|                                                |                       |                          | 3.06            | 8   | 30  | 36  | RH         | Paracingulate gyrus                       |
|                                                |                       |                          | 2.76            | -10 | 4   | 56  | LH         | Justapositional Lobule cortex             |
| Cluster 5<br>COG (46 24 17)                    | 882                   | 1.79                     | 5.29            | 42  | 34  | 14  | RH         | Inferior Frontal gyrus, pars triangularis |
|                                                |                       |                          | 4.49            | 46  | 6   | 22  | RH         | Precentral gyrus                          |
|                                                |                       |                          | 3.78            | 54  | 38  | 10  | RH         | Frontal pole                              |
|                                                |                       |                          | 3.53            | 36  | 6   | 22  | RH         | Precentral gyrus                          |
|                                                |                       |                          | 3.19            | 46  | 22  | 18  | RH         | Inferior Frontal gyrus, pars triangularis |
|                                                |                       |                          | 2.95            | 56  | 20  | 28  | RH         | Inferior Frontal gyrus, pars opercularis  |
| <b>Global semantics &gt; feature selection</b> |                       |                          |                 |     |     |     |            |                                           |
| Cluster 1<br>COG (19 -52 27)                   | 17163                 | 23.2                     | 6.11            | -6  | -60 | 24  | LH         | Precuneus cortex                          |
|                                                |                       |                          | 5.87            | -6  | -52 | 24  | LH         | Posterior Cingulate gyrus                 |
|                                                |                       |                          | 5.77            | -2  | -68 | 22  | LH         | Precuneus cortex                          |
|                                                |                       |                          | 5.68            | 10  | -60 | 26  | RH         | Precuneus cortex                          |
|                                                |                       |                          | 5.67            | 56  | -10 | -22 | RH         | Posterior Middle Temporal gyrus           |
| Cluster 2<br>COG (2 45)                        | 7451                  | 12.6                     | 5.63            | 2   | -54 | 50  | RH         | Precuneus cortex                          |
|                                                |                       |                          | 5.16            | 0   | 52  | -10 | RH         | Frontal medial cortex                     |
|                                                |                       |                          | 5.04            | 8   | 56  | 0   | RH         | Frontal pole                              |

|              |      |      |      |     |     |     |    |                                   |
|--------------|------|------|------|-----|-----|-----|----|-----------------------------------|
| 19)          |      |      | 4    | 0   | 56  | 2   | RH | Frontal pole                      |
|              |      |      | 4.87 | -4  | 40  | 6   | LH | Cingulate gyrus                   |
|              |      |      | 4.82 | -14 | 50  | 38  | LH | Frontal pole                      |
|              |      |      | 4.71 | 14  | 52  | 30  | RH | Frontal pole                      |
|              |      |      | 5    | -40 | -78 | 34  | LH | Superior Lateral Occipital cortex |
|              |      |      | 4.5  | -52 | -68 | 22  | LH | Superior Lateral Occipital cortex |
| Cluster 3    |      |      | 4.42 | -56 | -66 | 16  | LH | Superior Lateral Occipital cortex |
| COG (-48 68  | 1438 | 3.1  | 4.41 | -46 | -78 | 26  | LH | Superior Lateral Occipital cortex |
| 26)          |      |      | 4.29 | -52 | -68 | 28  | LH | Superior Lateral Occipital cortex |
|              |      |      | 4.19 | -44 | -60 | 26  | LH | Angular gyrus                     |
|              |      |      | 5.33 | -64 | -28 | -8  | LH | Posterior Middle Temporal gyrus   |
|              |      |      | 5.31 | -62 | -20 | -12 | LH | Posterior Middle Temporal gyrus   |
| Cluster 4    |      |      | 4.68 | -56 | -14 | -22 | LH | Posterior Middle Temporal gyrus   |
| COG (-58 -17 | 1074 | 2.26 | 4.32 | -48 | 2   | -38 | LH | Temporal pole                     |
| -18)         |      |      | 3.92 | -56 | -6  | -28 | LH | Anterior Middle Temporal gyrus    |
|              |      |      | 2.93 | -52 | 6   | -28 | LH | Temporal pole                     |

Table provides data for all significant clusters and sub-peaks within each cluster, with the first sub-peak being the cluster maxima. Location was determined using the Harvard-Oxford cortical structural atlas built into FSL. COG = centre of gravity.

Table S3. Cluster COG, size, and sub-peaks for the PPI analysis in figure 4. Peaks were identified in z-statistic spatial maps following cluster correction for multiple comparisons with a Z inclusion threshold of 2.3 and a cluster significance threshold set at  $p < .05$ .

|                                                                      | Cluster size (Voxels) | Cluster p-value (-log10) | MNI coordinates |     |     |     | Hemisphere | Location                                                                                                |
|----------------------------------------------------------------------|-----------------------|--------------------------|-----------------|-----|-----|-----|------------|---------------------------------------------------------------------------------------------------------|
|                                                                      |                       |                          | Z               | X   | Y   | Z   |            |                                                                                                         |
| <b>Action &gt; colour PPI</b>                                        |                       |                          |                 |     |     |     |            |                                                                                                         |
| Cluster 1 COG (-10 -82 -11)                                          | 4729                  | 19.5                     | 5.01            | -20 | -98 | -16 | LH         | Occipital pole                                                                                          |
|                                                                      |                       |                          | 4.77            | -52 | -60 | -16 | LH         | Temporooccipital inferior temporal gyrus                                                                |
|                                                                      |                       |                          | 4.51            | 22  | -94 | -14 | RH         | Occipital pole                                                                                          |
|                                                                      |                       |                          | 4.45            | 36  | -92 | -12 | RH         | Inferior lateral occipital cortex                                                                       |
|                                                                      |                       |                          | 4.19            | -32 | -90 | -16 | LH         | Inferior lateral occipital cortex                                                                       |
|                                                                      |                       |                          | 4.19            | -48 | -62 | -8  | LH         | Inferior lateral occipital cortex/Temporooccipital inferior temporal gyrus                              |
|                                                                      |                       |                          | 5.03            | -54 | 18  | 28  | LH         | Inferior frontal gyrus (pars opercularis)<br>Inferior frontal gyrus (pars opercularis)/Precentral gyrus |
| Cluster 2 COG (-44 20 19)                                            | 3422                  | 15.3                     | 4.8             | -54 | 12  | 30  | LH         | Frontal pole                                                                                            |
|                                                                      |                       |                          | 4.78            | -46 | 44  | -4  | LH         | Frontal pole                                                                                            |
|                                                                      |                       |                          | 4.69            | -50 | 40  | 8   | LH         | Frontal pole                                                                                            |
|                                                                      |                       |                          | 4.59            | -44 | 30  | 10  | LH         | Inferior frontal gyrus (pars triangularis)                                                              |
|                                                                      |                       |                          | 4.59            | -46 | 24  | 18  | LH         | Inferior frontal gyrus (pars triangularis)                                                              |
|                                                                      |                       |                          | 4.44            | -24 | -80 | 46  | LH         | Superior Lateral occipital cortex                                                                       |
|                                                                      |                       |                          | 4.36            | -24 | -72 | 46  | LH         | Superior Lateral occipital cortex                                                                       |
| Cluster 3 COG (-24 -80 26)                                           | 1761                  | 9.09                     | 4.05            | -36 | -56 | 46  | LH         | Superior parietal lobule/Angular gyrus<br>Superior parietal lobule/Posterior Supramarginal gyrus        |
|                                                                      |                       |                          | 3.87            | -32 | -52 | 44  | LH         | Anterior Supramarginal gyrus                                                                            |
|                                                                      |                       |                          | 3.46            | -52 | -36 | 44  | LH         | Anterior Supramarginal gyrus                                                                            |
|                                                                      |                       |                          | 3.37            | -34 | -60 | 52  | LH         | Superior Lateral occipital cortex                                                                       |
| Cluster 4 COG (-4 18 32)                                             | 453                   | 2.41                     | 5.12            | -4  | 18  | 42  | LH         | Paracingulate gyrus                                                                                     |
| <b>Global &gt; size PPI</b>                                          |                       |                          |                 |     |     |     |            |                                                                                                         |
| Cluster 1 COG (-49 23 14)                                            | 1612                  | 8.45                     | 4.61            | -52 | 24  | 18  | LH         | Inferior frontal gyrus (pars triangularis)                                                              |
|                                                                      |                       |                          | 4.55            | -56 | 24  | 20  | LH         | Inferior frontal gyrus (pars triangularis)                                                              |
|                                                                      |                       |                          | 4.4             | -54 | 32  | 10  | LH         | Inferior frontal gyrus (pars triangularis)                                                              |
|                                                                      |                       |                          | 4.39            | -46 | 18  | 20  | LH         | Inferior frontal gyrus (pars opercularis)                                                               |
|                                                                      |                       |                          | 3.9             | -38 | 6   | 22  | LH         | Inferior frontal gyrus (pars opercularis)                                                               |
|                                                                      |                       |                          | 3.86            | -52 | 38  | 0   | LH         | Frontal pole                                                                                            |
| <b>Action &gt; colour PPI &amp; Global &gt; size PPI conjunction</b> |                       |                          |                 |     |     |     |            |                                                                                                         |
| Cluster 1 COG (-48 23 15)                                            | 1262                  | 6.92                     | 4.26            | -50 | 24  | 18  | LH         | Inferior frontal gyrus (pars triangularis)                                                              |
|                                                                      |                       |                          | 3.94            | -38 | 14  | 20  | LH         | Inferior frontal gyrus (pars opercularis)                                                               |
|                                                                      |                       |                          | 3.9             | -38 | 6   | 22  | LH         | Inferior frontal gyrus (pars opercularis)                                                               |
|                                                                      |                       |                          | 3.86            | -52 | 38  | 0   | LH         | Frontal pole                                                                                            |
|                                                                      |                       |                          | 3.81            | -48 | 30  | 14  | LH         | Inferior frontal gyrus (pars triangularis)                                                              |
|                                                                      |                       |                          | 3.58            | -52 | 36  | 8   | LH         | Inferior frontal gyrus (pars triangularis)                                                              |

Table provides data for all significant clusters and sub-peaks within each cluster, with the first sub-peak being the cluster maxima. Location was determined using the Harvard-Oxford cortical structural atlas built into FSL. COG = centre of gravity.

Table S4. Cluster COG, size, and sub-peaks for the resting-state fMRI networks in figure 5. Peaks were identified in z-statistic spatial maps following cluster correction for multiple comparisons with a Z inclusion threshold of 2.3 and a cluster significance threshold set at  $p < .05$ .

|                                  | Cluster size (Voxels) | Cluster p-value (-log10) | Z    | MNI coordinates |     |     | Hemisphere | Location                                                         |
|----------------------------------|-----------------------|--------------------------|------|-----------------|-----|-----|------------|------------------------------------------------------------------|
|                                  |                       |                          |      | X               | Y   | Z   |            |                                                                  |
| <b>-45 39 3</b>                  |                       |                          |      |                 |     |     |            |                                                                  |
| Cluster 1<br>COG (-41<br>0 10)   | 18706                 | 26.4                     | 21.9 | -44             | 38  | 2   | LH         | Frontal pole/Inferior Frontal gyrus, pars triangularis           |
|                                  |                       |                          | 12.1 | -46             | 8   | 20  | LH         | Inferior Frontal gyrus, pars opercularis/Precentral gyrus        |
|                                  |                       |                          | 11.8 | -52             | 10  | 14  | LH         | Inferior Frontal gyrus, pars opercularis                         |
|                                  |                       |                          | 11.7 | -50             | 18  | 22  | LH         | Inferior Frontal gyrus, pars opercularis                         |
|                                  |                       |                          | 10.4 | -56             | -60 | -8  | LH         | Temporooccipital middle temporal gyrus                           |
|                                  |                       |                          | 9.22 | -28             | 18  | -2  | LH         | Insular cortex                                                   |
| Cluster 2<br>COG (48<br>42 0)    | 5085                  | 12.6                     | 12.6 | 48              | 42  | 0   | RH         | Frontal pole                                                     |
|                                  |                       |                          | 8.06 | 26              | 34  | -14 | RH         | Frontal pole/Frontal orbital cortex                              |
|                                  |                       |                          | 7.64 | 56              | 16  | 16  | RH         | Inferior Frontal gyrus, pars opercularis                         |
|                                  |                       |                          | 6.68 | 46              | 10  | 28  | RH         | Precentral gyrus/Inferior Frontal gyrus, pars opercularis        |
|                                  |                       |                          | 5.42 | 40              | 28  | 6   | RH         | Inferior Frontal gyrus, pars triangularis                        |
| Cluster 3<br>COG (24<br>-74 -35) | 1776                  | 8.27                     | 5.41 | 42              | 32  | -4  | RH         | Frontal orbital cortex/Inferior Frontal gyrus, pars triangularis |
|                                  |                       |                          | 8.27 | 12              | -78 | -32 | RH         | Cerebellum                                                       |
|                                  |                       |                          | 7.33 | 30              | -68 | -34 | RH         | Cerebellum                                                       |
|                                  |                       |                          | 7.08 | 34              | -68 | -44 | RH         | Cerebellum                                                       |
| Cluster 4<br>COG (58<br>-50 -11) | 678                   | 6.05                     | 5.27 | 20              | -76 | -44 | RH         | Cerebellum                                                       |
|                                  |                       |                          | 6.05 | 56              | -48 | -10 | RH         | Temporooccipital Inferior/middle Temporal gyrus                  |
|                                  |                       |                          | 2.54 | 52              | -48 | -24 | RH         | Temporooccipital inferior temporal gyrus                         |
|                                  |                       |                          | 2.48 | 50              | -46 | -30 | RH         | Temporooccipital inferior temporal gyrus                         |
| <b>-58 -49 -9</b>                |                       |                          |      |                 |     |     |            |                                                                  |
| Cluster 1<br>COG (-24<br>-31 1)  | 23986                 | 30.6                     | 22.4 | -60             | -50 | -10 | LH         | Temporooccipital middle temporal gyrus                           |
|                                  |                       |                          | 12.3 | 60              | -46 | -10 | RH         | Temporooccipital middle temporal gyrus                           |
|                                  |                       |                          | 11.9 | -42             | 46  | -12 | LH         | Frontal pole                                                     |
|                                  |                       |                          | 10.9 | -50             | 36  | 10  | LH         | Inferior Frontal gyrus, pars triangularis                        |
|                                  |                       |                          | 10.9 | 32              | -72 | -44 | RH         | Cerebellum                                                       |
|                                  |                       |                          | 10.6 | -34             | -74 | 44  | LH         | Superior lateral occipital cortex                                |
|                                  |                       |                          | 6.86 | 38              | 40  | -14 | RH         | Frontal pole                                                     |
| Cluster 2<br>COG (48<br>42 0)    | 1965                  | 4.66                     | 5.76 | 44              | 52  | -12 | RH         | Frontal pole                                                     |
|                                  |                       |                          | 5.53 | 46              | 16  | 32  | RH         | Middle frontal gyrus                                             |
|                                  |                       |                          | 5.38 | 48              | 28  | 20  | RH         | Inferior Frontal gyrus, pars triangularis                        |
|                                  |                       |                          | 5.06 | 50              | 38  | 10  | RH         | Frontal pole/Inferior Frontal gyrus, pars triangularis           |
|                                  |                       |                          | 4.39 | 38              | 12  | 32  | RH         | Middle frontal gyrus                                             |
| Cluster 3<br>COG (42<br>-62 43)  | 1341                  | 3.31                     | 6.49 | 36              | -66 | 48  | RH         | Superior lateral occipital cortex                                |
|                                  |                       |                          | 5.81 | 40              | -64 | 38  | RH         | Superior lateral occipital cortex                                |
|                                  |                       |                          | 4.35 | 48              | -56 | 50  | RH         | Angular gyrus                                                    |
|                                  |                       |                          | 3.88 | 52              | -48 | 50  | RH         | Angular gyrus/Supramarginal gyrus                                |
| <b>Conjunction</b>               |                       |                          |      |                 |     |     |            |                                                                  |
| Cluster 1                        | 2709                  | 5.58                     | 7.17 | -40             | 30  | -14 | LH         | Frontal orbital cortex                                           |

|                                   |      |      |      |     |     |     |    |                                           |
|-----------------------------------|------|------|------|-----|-----|-----|----|-------------------------------------------|
| COG (-42<br>21 -8)                |      |      | 7.15 | -44 | 32  | -12 | LH | Frontal orbital cortex                    |
|                                   |      |      | 7.12 | -50 | 28  | -4  | LH | Inferior Frontal gyrus, pars triangularis |
|                                   |      |      | 6.97 | -56 | 22  | 8   | LH | Inferior Frontal gyrus, pars triangularis |
|                                   |      |      | 6.94 | -54 | 24  | 4   | LH | Inferior Frontal gyrus, pars triangularis |
|                                   |      |      | 6.88 | -52 | 18  | 10  | LH | Inferior Frontal gyrus, pars opercularis  |
|                                   |      |      | 5.81 | -62 | -44 | -10 | LH | Posterior middle temporal gyrus           |
| Cluster 2<br>COG (-46<br>-37 -17) | 1092 | 2.34 | 5.07 | -30 | 0   | -42 | LH | Anterior temporal fusiform cortex         |
|                                   |      |      | 5.02 | -40 | -38 | -22 | LH | Posterior temporal fusiform cortex        |
|                                   |      |      | 4.51 | -42 | -44 | -26 | LH | Posterior temporal fusiform cortex        |
|                                   |      |      | 4.31 | -44 | -48 | -30 | LH | Temporal occipital fusiform cortex        |
|                                   |      |      | 3.91 | -34 | -12 | -40 | LH | Posterior temporal fusiform cortex        |
|                                   |      |      | 6.88 | -8  | 30  | 48  | LH | Superior frontal gyrus                    |
| Cluster 3<br>COG (-10<br>38 37)   | 762  | 1.6  | 5.97 | -10 | 26  | 50  | LH | Superior frontal gyrus                    |
|                                   |      |      | 5.48 | -8  | 18  | 52  | LH | Superior frontal gyrus                    |
|                                   |      |      | 3.98 | -14 | 60  | 18  | LH | Frontal pole                              |
|                                   |      |      | 3.96 | -16 | 56  | 18  | LH | Frontal pole                              |
|                                   |      |      | 3.08 | -8  | 40  | 20  | LH | Paracingulate gyrus/anterior cingulate    |

Table provides data for all significant clusters and sub-peaks within each cluster, with the first sub-peak being the cluster maxima. Location was determined using the Harvard-Oxford cortical structural atlas built into FSL. COG = centre of gravity.

Table S5. Cluster COG, size, and sub-peaks for the resting-state fMRI networks in figure 6. Peaks were identified in z-statistic spatial maps following cluster correction for multiple comparisons with a Z inclusion threshold of 2.3 and a cluster significance threshold set at  $p < .05$ .

|                                 | Cluster size (Voxels) | Cluster p-value (-log10) | MNI coordinates |     |     |     | Hemisphere | Location                                                        |
|---------------------------------|-----------------------|--------------------------|-----------------|-----|-----|-----|------------|-----------------------------------------------------------------|
|                                 |                       |                          | Z               | X   | Y   | Z   |            |                                                                 |
| <b>-48 18 18 &gt; -51 27 -3</b> |                       |                          |                 |     |     |     |            |                                                                 |
| Cluster 1<br>COG (-40 -3 17)    | 18363                 | 25.8                     | 22.4            | -50 | 18  | 20  | LH         | Inferior Frontal gyrus, pars opercularis                        |
|                                 |                       |                          | 11.8            | -44 | 6   | 40  | LH         | Middle frontal gyrus                                            |
|                                 |                       |                          | 11.8            | -40 | 4   | 48  | LH         | Middle frontal gyrus                                            |
|                                 |                       |                          | 11.8            | -46 | 44  | -6  | LH         | Frontal pole                                                    |
|                                 |                       |                          | 11              | -4  | 34  | 44  | LH         | Superior frontal gyrus/paracingulate gyrus                      |
|                                 |                       |                          | 10.4            | -32 | 12  | 50  | LH         | Middle frontal gyrus                                            |
| Cluster 2<br>COG (50 13 13)     | 5155                  | 10.3                     | 13              | 48  | 24  | 20  | RH         | Inferior Frontal gyrus, pars triangularis/opercularis           |
|                                 |                       |                          | 6.49            | 46  | 6   | 46  | RH         | Middle frontal gyrus/precentral gyrus                           |
|                                 |                       |                          | 5.78            | 52  | 36  | -10 | RH         | Frontal pole                                                    |
|                                 |                       |                          | 5.06            | 60  | -42 | -6  | RH         | Temporooccipital middle Temporal gyrus                          |
|                                 |                       |                          | 5               | 68  | -38 | -6  | RH         | Temporooccipital middle Temporal gyrus                          |
| Cluster 3<br>COG (24 -75 -34)   | 2099                  | 5.02                     | 4.83            | 34  | 24  | -6  | RH         | Frontal orbital cortex                                          |
|                                 |                       |                          | 8.92            | 14  | -76 | -32 | RH         | Cerebellum                                                      |
|                                 |                       |                          | 7.85            | 28  | -70 | -44 | RH         | Cerebellum                                                      |
|                                 |                       |                          | 7.79            | 32  | -70 | -34 | RH         | Cerebellum                                                      |
| <b>-51 27 -3 &gt; -48 18 18</b> |                       |                          |                 |     |     |     |            |                                                                 |
| Cluster 1<br>COG (-37 6 9)      | 21198                 | 28.8                     | 22              | -52 | 26  | -4  | LH         | Inferior Frontal gyrus, pars triangularis                       |
|                                 |                       |                          | 12.6            | -6  | 16  | 56  | LH         | Superior frontal gyrus                                          |
|                                 |                       |                          | 11.4            | -54 | -38 | -6  | LH         | Posterior middle temporal gyrus                                 |
|                                 |                       |                          | 10.9            | -6  | 30  | 50  | LH         | Superior frontal gyrus                                          |
|                                 |                       |                          | 10.7            | -60 | -50 | 28  | LH         | Supramarginal gyrus/Angular gyrus                               |
|                                 |                       |                          | 10.6            | -8  | 46  | 40  | LH         | Frontal pole/Superior frontal gyrus                             |
| Cluster 2<br>COG (47 11 -1)     | 6520                  | 12.4                     | 13.2            | 50  | 30  | -6  | RH         | Frontal orbital cortex/Inferior Frontal gyrus, pars opercularis |
|                                 |                       |                          | 9.54            | 36  | 26  | -16 | RH         | Frontal orbital cortex                                          |
|                                 |                       |                          | 8.4             | 54  | -34 | -2  | RH         | Posterior middle temporal gyrus                                 |
|                                 |                       |                          | 5.99            | 16  | 10  | 8   | RH         | Right caudate                                                   |
|                                 |                       |                          | 5.87            | 54  | 12  | -22 | RH         | Temporal pole                                                   |
| Cluster 3<br>COG (26 -76 -34)   | 2155                  | 5.11                     | 5.4             | 36  | 12  | -4  | RH         | Insular cortex                                                  |
|                                 |                       |                          | 9.61            | 26  | -78 | -36 | RH         | Cerebellum                                                      |
|                                 |                       |                          | 9.47            | 24  | -78 | -32 | RH         | Cerebellum                                                      |
|                                 |                       |                          | 4.36            | 48  | -62 | -34 | RH         | Cerebellum                                                      |

Table provides data for all significant clusters and sub-peaks within each cluster, with the first sub-peak being the cluster maxima. Location was determined using the Harvard-Oxford cortical structural atlas built into FSL. COG = centre of gravity.
